# Supplementary material for: Lipid Profile, Lipoprotein Subfractions, and Fluidity of Membranes in Children and Adolescents with Depressive Disorder: Effect of Omega-3 Fatty Acids in a Double-Blind Randomized Controlled Study
Source: Biomolecules. 2020 Oct 8;10(10):1427. doi: 10.3390/biom10101427 (PMC7650679; doi:10.3390/biom10101427)
Supplement: Supplementary file 1 [file biomolecules-10-01427-s001.zip]

Archive with 10 entries (10 files):
- Supplement Figure S1.pdf
- Supplement S1.pdf
- Supplement S2.pdf
- Supplement S3.pdf
- Supplement S4.pdf
- Supplement S5.pdf
- Supplement Table S1.pdf
- Supplement Table S2.pdf
- Supplement Table S3.pdf
- Supplement Table S4.pdf
