# Supplementary material for: Lipid Profile, Lipoprotein Subfractions, and Fluidity of Membranes in Children and Adolescents with Depressive Disorder: Effect of Omega-3 Fatty Acids in a Double-Blind Randomized Controlled Study
Source: Biomolecules. 2020 Oct 8;10(10):1427. doi: 10.3390/biom10101427 (PMC7650679; doi:10.3390/biom10101427)
Supplement: Supplementary file 1 [file biomolecules-10-01427-s001.zip › Supplement S2.pdf]

## Supplement S2. Biochemical markers in controls and patients at the baseline and during the intervention at the week 6 and 12

| Marker | Unit    | Physiol. | Controls |      |          | All    |      | Om3    |      |          |         |      |           | Om6    |      |          |         |       |           |
|--------|---------|----------|----------|------|----------|--------|------|--------|------|----------|---------|------|-----------|--------|------|----------|---------|-------|-----------|
|        |         | values   |          | ±SD  | p C vs P | Week 0 | ±SD  | Week 6 | ±SD  | p 0 vs 6 | Week 12 | ±SD  | p 0 vs 12 | Week 6 | ±SD  | p 0 vs 6 | Week 12 | ±SD   | p 0 vs 12 |
|        |         | n        | 20       |      |          | 60     |      | 28     |      |          | 25      |      |           | 25     |      |          | 26      |       |           |
| Glu    | mmol/L  | 4.2-6.1  | 4.89     | 0.5  | 0.66     | 4.79   | 0.5  | 4.78   | 0.4  | 0.684    | 4.65    | 0.6  | 0.791     | 4.95   | 0.8  | 0.385    | 5.07    | 0.91  | 0.138     |
| CreV   | μmol/L  | 21-85    | 59.65    | 12.4 | 0.22     | 63.04  | 11.0 | 62.64  | 11.1 | 0.806    | 64.12   | 12.3 | 0.744     | 62.04  | 10.2 | 0.627    | 62.38   | 9.60  | 0.725     |
| UA     | μmol/L  | 100-360  | 296.65   | 70.9 | 0.23     | 258.45 | 73.7 | 276.21 | 79.4 | 0.883    | 271.92  | 72.7 | 0.852     | 268.63 | 49.9 | 0.753    | 268.62  | 56.17 | 0.761     |
| TCH    | mmol/L  | 3.87-5.2 | 3.85     | 0.6  | 0.718    | 3.94   | 0.6  | 4.21   | 0.7  | 0.051    | 4.04    | 0.8  | 0.038     | 4.18   | 0.8  | 0.082    | 4.18    | 0.68  | 0.079     |
| HDL    | mmol/L  | >0.9     | 1.41     | 0.3  | 0.222    | 1.54   | 0.3  | 1.61   | 0.4  | 0.171    | 1.53    | 0.3  | 0.208     | 1.66   | 0.4  | 0.041    | 1.62    | 0.39  | 0.141     |
| LDL    | mmol/L  | <3.4     | 2.16     | 0.6  | 0.696    | 2.11   | 0.6  | 2.36   | 0.8  | 0.079    | 2.20    | 0.6  | 0.022     | 2.32   | 0.7  | 0.141    | 2.31    | 0.71  | 0.157     |
| TAG    | mmol/L  | 0-1.3    | 0.81     | 0.3  | 0.169    | 0.94   | 0.5  | 0.86   | 0.3  | 0.287    | 0.82    | 0.4  | 0.105     | 0.81   | 0.3  | 0.141    | 0.93    | 0.50  | 0.718     |
| AI     | LDL/HDL | <3.5     | 1.61     | 0.6  | 0.386    | 1.45   | 0.6  | 1.61   | 0.8  | 0.405    | 1.51    | 0.6  | 0.164     | 1.49   | 0.6  | 0.949    | 1.56    | 0.71  | 0.582     |
| AST    | μkat/L  | 0-0.85   | 0.39     | 0.1  | 0.693    | 0.38   | 0.1  | 0.43   | 0.1  | 0.066    | 0.37    | 0.1  | 0.173     | 0.39   | 0.1  | 0.625    | 0.38    | 0.11  | 0.914     |
| ALT    | μkat/L  | 0-0.75   | 0.27     | 0.1  | 0.710    | 0.32   | 0.2  | 0.40   | 0.3  | 0.011    | 0.28    | 0.1  | 0.614     | 0.35   | 0.2  | 0.142    | 0.28    | 0.11  | 0.984     |
| GMT    | μkat/L  | 0.17-1.7 | 0.18     | 0.1  | 0.748    | 0.18   | 0.1  | 0.21   | 0.1  | 0.113    | 0.19    | 0.1  | 0.072     | 0.21   | 0.1  | 0.092    | 0.21    | 0.11  | 0.147     |
| CREA_U | mmol/L  | 7.0-18.0 | 16.59    | 7.9  | 0.14     | 11.94  | 8.9  | 16.09  | 12.3 | 0.224    | 15.85   | 10.5 | 0.815     | 12.38  | 8.9  | 0.710    | 12.05   | 9.99  | 0.617     |
| hsCRP  | mg/L    |          | <0.5     |      |          | 0.74   | 1.4  | 0.67   | 1.6  | 0.795    | 0.42    | 1.2  | 0.380     | 0.84   | 1.4  | 0.449    | 0.47    | 0.90  | 0.749     |

Glu - fasting glucose, CreV - creatinine, UA - uric acid, TCH - total cholesterol, HDL - HDL-cholesterol, LDL - LDL-cholesterol, TAG - triacylglycerols, AI - atherogenic index (LDL/HDL), AST - Aspartate Aminotransferase, ALT - Alanine Aminotransferase, GMT - Gamma-glutamyltransferase, Crea\_U - creatinine in urine, hsCRP - high sensitive C-reactive protein, C - control, P - patients, n - number of subjects, SD - standard deviation, Om3 - Omega-3 group, Om6 - Omega-6 group, vs - versus
