# Supplementary material for: Lipid Profile, Lipoprotein Subfractions, and Fluidity of Membranes in Children and Adolescents with Depressive Disorder: Effect of Omega-3 Fatty Acids in a Double-Blind Randomized Controlled Study
Source: Biomolecules. 2020 Oct 8;10(10):1427. doi: 10.3390/biom10101427 (PMC7650679; doi:10.3390/biom10101427)
Supplement: Supplementary file 1 [file biomolecules-10-01427-s001.zip › Supplement S4.pdf]

# Supplement S4. HDL subfractions in serum of controls and patients at the baseline and durin the intervention at the week 6 and 12

| Subfraction<br>(% Area) | Controls |      |          | All    |     | Om3    |     |          |         |      |           | Om6    |     |          |         |      |           | p Om3 vs Om6 |        |         |
|-------------------------|----------|------|----------|--------|-----|--------|-----|----------|---------|------|-----------|--------|-----|----------|---------|------|-----------|--------------|--------|---------|
|                         |          | ±SD  | p C vs P | Week 0 | ±SD | Week 6 | ±SD | p 0 vs 6 | Week 12 | ±SD  | p 0 vs 12 | Week 6 | ±SD | p 0 vs 6 | Week 12 | ±SD  | p 0 vs 12 | Week 0       | Week 6 | Week 12 |
|                         | n=21     |      |          | n=58   |     | n=28   |     |          | n=26    |      |           | n=29   |     |          | n=27    |      |           |              |        |         |
| L-HDL1                  | 7,1      | 5,5  | 0,006    | 10,6   | 4,4 | 12,9   | 4,7 | 0,000    | 12,6    | 5,1  | 0,006     | 10,9   | 3,6 | 0,904    | 12,1    | 6,3  | 0,390     | 0,657        | 0,084  | 0,754   |
| L-HDL2                  | 17,0     | 3,9  | 0,745    | 16,6   | 4,0 | 19,3   | 3,5 | 0,001    | 18,4    | 5,1  | 0,052     | 16,8   | 3,7 | 0,671    | 15,5    | 5,2  | 0,548     | 0,541        | 0,011  | 0,046   |
| L-HDL3                  | 12,0     | 2,6  | 0,588    | 11,7   | 2,4 | 13,9   | 2,9 | 0,021    | 13,2    | 3,5  | 0,025     | 12,4   | 3,3 | 0,370    | 11,5    | 3,2  | 0,924     | 0,396        | 0,070  | 0,061   |
| L-HDL1-3                | 36,0     | 10,1 | 0,235    | 38,8   | 9,0 | 44,4   | 7,3 | 0,020    | 44,0    | 10,5 | 0,003     | 39,6   | 8,1 | 0,731    | 38,6    | 12,1 | 0,851     | 0,878        | 0,025  | 0,097   |
| Chol 1-3<br>mg/mL       | 15,4     | 6,3  | 0,022    | 20,1   | 8,4 | 23,9   | 9,6 | 0,001    | 20,2    | 8,8  | 0,201     | 21,5   | 8,4 | 0,696    | 20,6    | 9,6  | 0,904     | 0,489        | 0,340  | 0,887   |
| I-HDL4                  | 13,6     | 2,0  | 0,031    | 12,5   | 1,8 | 13,4   | 1,8 | 0,004    | 13,3    | 3,1  | 0,052     | 13,1   | 2,3 | 0,400    | 12,9    | 3,2  | 0,384     | 0,751        | 0,489  | 0,600   |
| I-HDL5                  | 13,1     | 2,5  | 0,030    | 11,9   | 1,9 | 11,7   | 2,6 | 0,105    | 12,2    | 1,7  | 0,848     | 11,4   | 2,0 | 0,650    | 11,3    | 2,8  | 0,705     | 0,150        | 0,631  | 0,168   |
| I-HDL6                  | 20,2     | 3,6  | 0,743    | 20,6   | 4,3 | 18,2   | 4,3 | 0,000    | 19,0    | 5,3  | 0,013     | 19,6   | 3,8 | 0,537    | 19,8    | 5,1  | 0,403     | 0,495        | 0,201  | 0,569   |
| I-HDL7                  | 5,4      | 1,4  | 0,166    | 6,0    | 1,7 | 5,1    | 1,6 | 0,002    | 5,4     | 2,2  | 0,007     | 5,7    | 1,6 | 0,549    | 5,9     | 1,9  | 0,502     | 0,879        | 0,158  | 0,374   |
| I-HDL4-7                | 53,2     | 5,8  | 0,157    | 51,1   | 6,0 | 48,3   | 6,8 | 0,001    | 50,0    | 7,6  | 0,220     | 49,8   | 5,5 | 0,650    | 50,0    | 9,0  | 0,686     | 0,381        | 0,373  | 0,987   |
| Chol 4-7<br>mg/mL       | 21,8     | 3,1  | 0,007    | 25,3   | 5,4 | 25,3   | 5,8 | 0,959    | 24,8    | 7,5  | 1,000     | 26,0   | 4,9 | 0,543    | 25,7    | 6,9  | 0,976     | 0,996        | 0,630  | 0,654   |
| S-HDL8                  | 4,2      | 1,8  | 0,261    | 4,7    | 1,8 | 4,3    | 1,7 | 0,155    | 4,2     | 2,2  | 0,012     | 5,0    | 1,7 | 0,463    | 5,3     | 2,1  | 0,257     | 0,786        | 0,128  | 0,078   |
| S-HDL9                  | 2,9      | 1,9  | 0,578    | 3,1    | 1,5 | 2,6    | 1,5 | 0,119    | 2,7     | 1,8  | 0,103     | 3,1    | 1,6 | 0,990    | 3,4     | 2,0  | 0,676     | 0,802        | 0,153  | 0,158   |
| S-HDL10                 | 3,5      | 3,7  | 0,089    | 2,2    | 2,7 | 1,5    | 2,4 | 0,290    | 1,4     | 2,1  | 0,060     | 2,1    | 3,5 | 0,995    | 2,4     | 3,0  | 0,703     | 0,916        | 0,432  | 0,173   |
| S-HDL8-10               | 10,4     | 7,1  | 0,805    | 10,0   | 5,2 | 8,3    | 4,9 | 0,110    | 8,2     | 5,5  | 0,011     | 10,4   | 5,7 | 0,844    | 11,1    | 6,6  | 0,618     | 0,922        | 0,144  | 0,092   |
| Chol 8-10<br>mg/mL      | 11,7     | 3,2  | 0,356    | 11,1   | 3,0 | 8,6    | 3,0 | 0,299    | 8,9     | 3,3  | 0,243     | 10,9   | 3,3 | 0,766    | 11,4    | 3,7  | 0,622     | 0,966        | 0,238  | 0,099   |

HDL - density lipoproteins, L-HDL - large HDL lipoprteins, I-HDL - intermediate HDL lipoproteins, S-HDL - small HDL lipoproteins, Cho - cholesterol, C - controls, P - patients, Om3 - omega-3 group, Om6 - omega-6 group, n - number of subjects, SD - standard deviation, p - significance
