# Supplementary material for: Lipid Profile, Lipoprotein Subfractions, and Fluidity of Membranes in Children and Adolescents with Depressive Disorder: Effect of Omega-3 Fatty Acids in a Double-Blind Randomized Controlled Study
Source: Biomolecules. 2020 Oct 8;10(10):1427. doi: 10.3390/biom10101427 (PMC7650679; doi:10.3390/biom10101427)
Supplement: Supplementary file 1 [file biomolecules-10-01427-s001.zip › Supplement Table S2.pdf]

**Supplement Table S2. LDL subfractions in serum of controls and patients at the baseline and during the intervention at the week 6 and 12**

| Subfraction<br>(mg/mL) | Controls |      |          | All    |      | Om3    |      |          |         |      |           | Om6    |      |          |         |      |           | p Om3 vs Om6 |        |         |
|------------------------|----------|------|----------|--------|------|--------|------|----------|---------|------|-----------|--------|------|----------|---------|------|-----------|--------------|--------|---------|
|                        |          | ±SD  | p C vs P | Week 0 | ±SD  | Week 6 | ±SD  | p 0 vs 6 | Week 12 | ±SD  | p 0 vs 12 | Week 6 | ±SD  | p 0 vs 6 | Week 12 | ±SD  | p 0 vs 12 | Week 0       | Week 6 | Week 12 |
|                        | 20       |      |          | 60     |      | 29     |      |          | 26      |      |           | 28     |      |          | 26      |      |           |              |        |         |
| VLDL                   | 19,3     | 4,5  | 0,001    | 26,1   | 8,1  | 25,2   | 7,7  | 0,328    | 24,6    | 9,4  | 0,134     | 25,5   | 7,3  | 0,724    | 23,3    | 7,7  | 0,056     | 0,531        | 0,974  | 0,345   |
| IDL-1                  | 22,0     | 3,3  | 0,973    | 21,9   | 13,0 | 21,4   | 5,6  | 0,125    | 20,6    | 5,9  | 0,560     | 21,8   | 6,4  | 0,480    | 21,0    | 6,0  | 0,366     | 0,346        | 0,706  | 0,775   |
| IDL-2                  | 7,8      | 3,4  | 0,015    | 6,0    | 2,6  | 6,5    | 3,3  | 0,480    | 6,7     | 3,0  | 0,286     | 6,1    | 2,2  | 0,475    | 6,6     | 2,4  | 0,012     | 0,409        | 0,298  | 0,712   |
| IDL-3                  | 13,9     | 3,6  | 0,432    | 12,9   | 5,3  | 12,5   | 6,2  | 0,508    | 12,6    | 4,4  | 0,838     | 12,6   | 5,3  | 0,886    | 13,2    | 4,9  | 0,438     | 0,391        | 0,859  | 0,528   |
| LDL-1                  | 36,8     | 10,2 | 0,028    | 31,0   | 10,1 | 35,0   | 11,2 | 0,001    | 34,6    | 12,2 | 0,006     | 34,1   | 11,2 | 0,032    | 34,4    | 10,5 | 0,115     | 0,639        | 0,383  | 0,615   |
| LDL-2                  | 9,4      | 7,4  | 0,296    | 7,7    | 6,1  | 10,7   | 8,7  | 0,003    | 8,1     | 4,3  | 0,135     | 11,3   | 8,7  | 0,049    | 10,9    | 8,2  | 0,235     | 0,607        | 0,746  | 0,643   |
| LDL-3                  | 0,0      | 0,0  | 0,137    | 0,2    | 0,7  | 0,6    | 1,3  | 0,110    | 0,3     | 0,9  | 0,600     | 0,9    | 3,5  | 0,264    | 0,5     | 1,1  | 0,312     | 0,822        | 0,772  | 0,869   |
| LDL-4                  | 0,0      | 0,0  |          | 0,0    | 0,0  | 0,0    | 0,0  |          | 0,0     | 0,2  | 0,327     | 0,1    | 0,4  | 0,326    | 0,0     | 0,2  | 0,327     |              | 0,303  | 0,323   |
| LDL-5                  | 0,0      | 0,0  |          | 0,0    | 0,0  | 0,0    | 0,0  |          | 0,0     | 0,0  |           | 0,0    | 0,0  |          | 0,0     | 0,0  |           |              |        |         |
| LDL-6                  | 0,0      | 0,0  |          | 0,0    | 0,0  | 0,0    | 0,0  |          | 0,0     | 0,0  |           | 0,0    | 0,0  |          | 0,0     | 0,0  |           |              |        |         |
| LDL-7                  | 0,0      | 0,0  |          | 0,0    | 0,0  | 0,0    | 0,0  |          | 0,0     | 0,0  |           | 0,0    | 0,0  |          | 0,0     | 0,0  |           |              |        |         |

VLDL - very low density lipoproteins, IDL - intermediate density lipoproteins, LDL - low density lipoproteins, C - controls, P - patients, Om3 - omega-3 group, Om6 - omega-6 group, n - number of subjects, SD - standard deviation, p - significance
