# Supplementary material for: Lipid Profile, Lipoprotein Subfractions, and Fluidity of Membranes in Children and Adolescents with Depressive Disorder: Effect of Omega-3 Fatty Acids in a Double-Blind Randomized Controlled Study
Source: Biomolecules. 2020 Oct 8;10(10):1427. doi: 10.3390/biom10101427 (PMC7650679; doi:10.3390/biom10101427)
Supplement: Supplementary file 1 [file biomolecules-10-01427-s001.zip › Supplement Table S4.pdf]

**Supplement Table S4. Activities of PON-L and PON-A in controls and in patients at the baseline and during the intervention at the week 6 and week 12**

| PON<br>(U/mL) | Controls |      |          | All    |      | Om3    |      |          |         |      |           | Om6    |      |          |         |      |           |
|---------------|----------|------|----------|--------|------|--------|------|----------|---------|------|-----------|--------|------|----------|---------|------|-----------|
|               | ±SD      |      | p C vs P | Week 0 | ±SD  | Week 6 | ±SD  | p 0 vs 6 | Week 12 | ±SD  | p 0 vs 12 | Week 6 | ±SD  | p 0 vs 6 | Week 12 | ±SD  | p 0 vs 12 |
|               | n=20     |      |          | n=59   |      | n=29   |      |          | n=26    |      |           | n=28   |      |          | n=26    |      |           |
| PON-L         | 10.6     | 2.6  | 0.520    | 10.2   | 2.6  | 10.9   | 3.5  | 0.084    | 9.6     | 2.2  | 0.146     | 10.7   | 3.8  | 0.997    | 11.1    | 3.7  | 0.919     |
| PON-A         | 122.7    | 23.0 | 0.142    | 117.2  | 26.1 | 115.7  | 30.2 | 0.249    | 118.5   | 29.3 | 0.519     | 115.4  | 20.6 | 0.805    | 119.9   | 20.4 | 0.352     |

PON - paraoxonase 1, PON-L - lactonase activity of PON 1, PON-A - arylesterase activity of PON 1, Om3 - omega-3 group, Om6 - omega-6 group, SD - standard deviation, V - controls, P - patients, p - significance, n - number of subjects
